# Supplementary material for: Europium (II)-Doped CaF2 Nanocrystals in Sol-Gel Derived Glass-Ceramic: Luminescence and EPR Spectroscopy Investigations
Source: MDPI journal article supplement (doi:10.3390/nano12173016), 2022-08-31
Supplement: s1 [file s1]

## Application Note

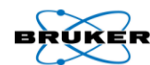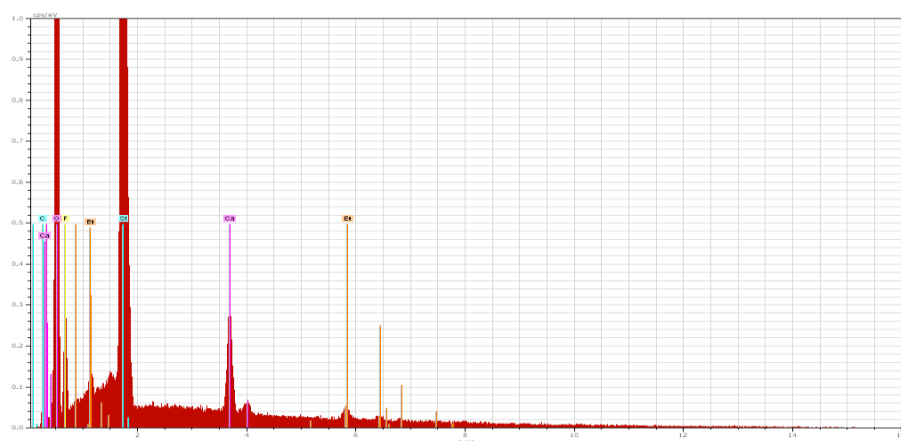

Spectrum: spectrum

| El     | AN | Series   | unn. C<br>[wt.-%] | norm. C<br>[wt.-%] | Atom. C<br>[at.-%] | Error<br>[%] |
|--------|----|----------|-------------------|--------------------|--------------------|--------------|
| C      | 6  | K-series | 1.34              | 1.13               | 1.93               | 0.3          |
| O      | 8  | K-series | 47.89             | 40.49              | 51.84              | 5.5          |
| F      | 9  | K-series | 18.21             | 15.39              | 16.60              | 2.9          |
| Si     | 14 | K-series | 45.25             | 38.26              | 27.91              | 1.9          |
| Ca     | 20 | K-series | 3.41              | 2.88               | 1.47               | 0.1          |
| Eu     | 63 | L-series | 2.19              | 1.85               | 0.25               | 0.1          |
| Total: |    |          | 118.29            | 100.00             | 100.00             |              |

**Figure S1.** The EDX spectra analysis of the glass-ceramic sample.

**The XPS spectra recorded on SiO<sub>2</sub>-CaF<sub>2</sub>-Eu glass-ceramic sample annealed in reducing atmosphere, shown in different energy regions**

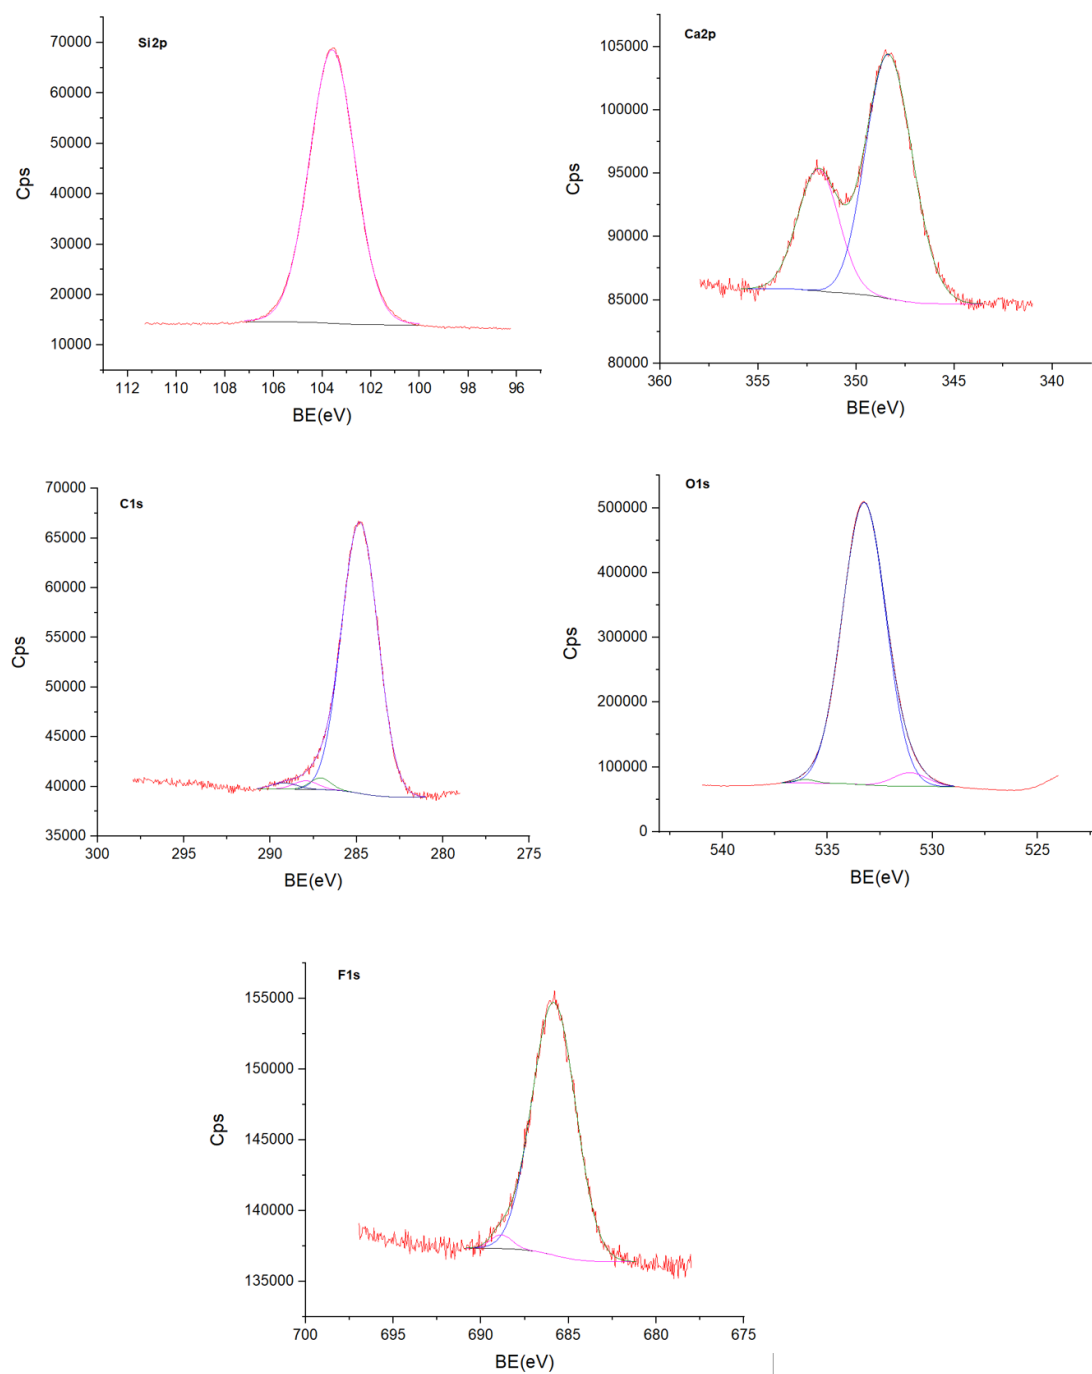

**Figure S2.** The XPS spectra were recorded on the glass-ceramic sample annealed in reducing atmosphere and shown in different energy regions.
